# Supplementary material
Source: PubMed Central journal article supplement (PMC3843242)
Supplement: NIHMS532584-supplement-1_si_001.pdf [file NIHMS532584-supplement-1_si_001.pdf]

## SUPPORTING INFORMATION for

### **Sortase-Tag Expressed Protein Ligation (STEPL): combining protein purification and site-specific bioconjugation into a single step.**

*Robert Warden-Rothman<sup>1</sup>, Ilaria Caturegli<sup>1</sup>, Vladimir Popik<sup>2</sup>, and Andrew Tsourkas<sup>1,\*</sup>*

<sup>1</sup>Department of Bioengineering, University of Pennsylvania, Philadelphia, PA 19104

<sup>2</sup>Department of Chemistry, University of Georgia, Athens, GA 30602

#### SUPPLEMENTAL FIGURE:

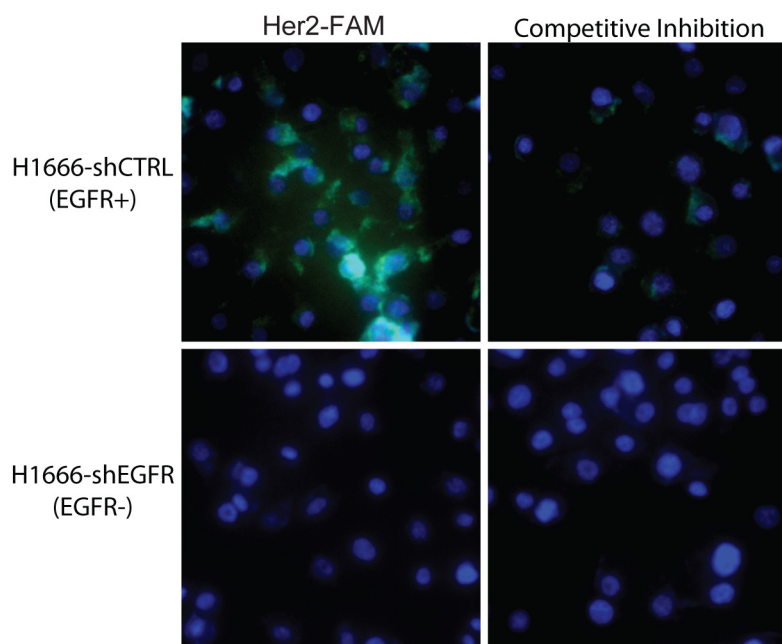

**Figure S1.** Functional evaluation of the EGFR affibody-FAM conjugate. (A) EGFR-positive and -negative cells were incubated with EGFR-targeted affibodies that were conjugated to FAM (green) using the STEPL system. Cells were also stained with Hoechst 33342 (nuclear stain, blue).
